# Supplementary material for: Study of potassium promoter effect for Ru/AC catalysts for ammonia synthesis
Source: Royal Society of Chemistry journal article supplement (doi:10.1039/c3cy20830c), 2013-01-01
Supplement: c3cy20830c.pdf [file c3cy20830c.pdf]

# Study of potassium promoter effect for Ru/AC catalysts of ammonia synthesis

Bingyu Lin\*, Kemei Wei, Xiaofeng Ma, Jianxin Lin, Jun Ni

National Engineering Research Center of Chemical Fertilizer Catalyst, Fuzhou University,

Fuzhou, Fujian 350002, PR China.

E-mail: bylin@fzu.edu.cn.

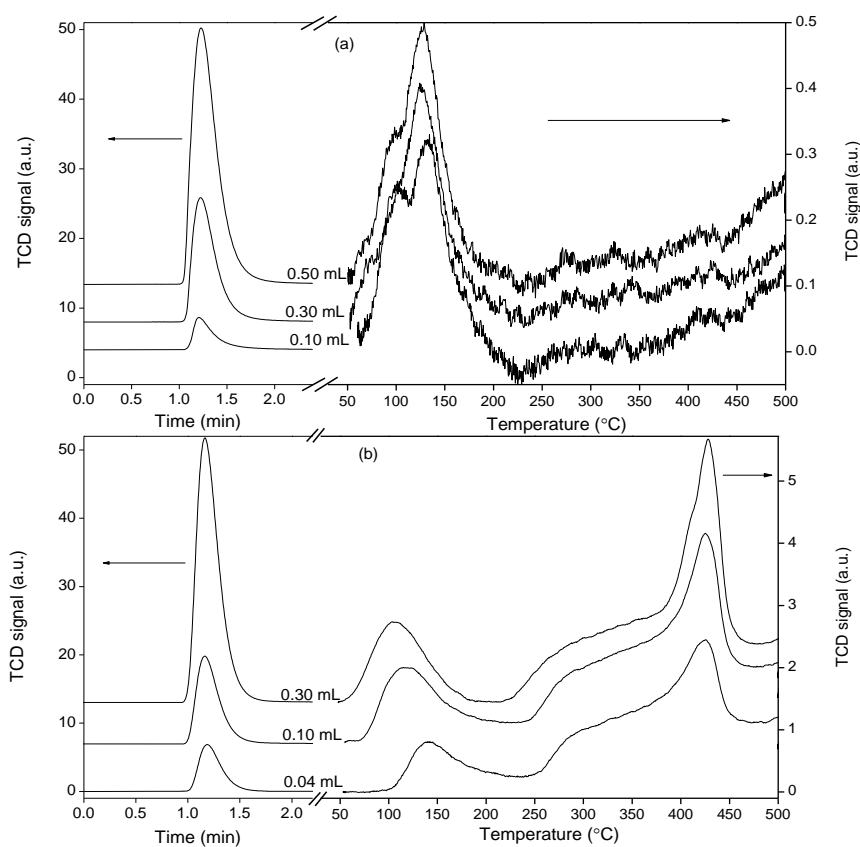

Fig. S1 The TPD profiles of (a) hydrogen and (b) nitrogen over 2K-Ru/AC adsorbed different amount of gas.

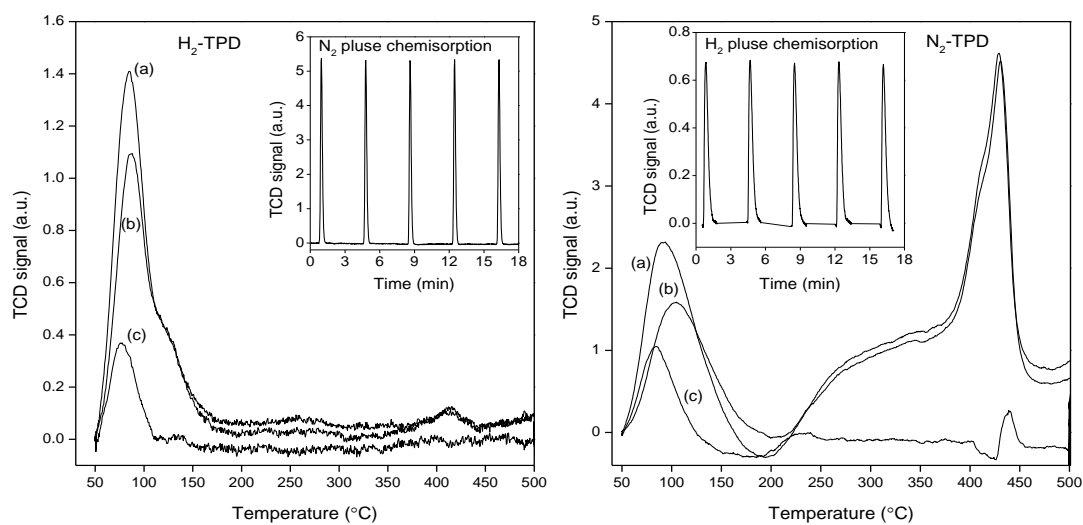

Fig. S2 (Left) The H<sub>2</sub>-TPD profiles of 2K-Ru/AC a) adsorbed hydrogen for 1h, b) adsorbed hydrogen for 1h and subsequently inject nitrogen for 5 times (0.4976 mL every time) and c) subtract the curve (b) from (a). (Right) The N<sub>2</sub>-TPD profiles of 2K-Ru/AC a) adsorbed nitrogen for 1h, b) adsorbed nitrogen for 1h and subsequently inject hydrogen for 5 times, and c) subtract the curve (b) from (a).
